# Supplementary material for: Propensity for Calcification in Serum Associates With 2-Year Cardiovascular Mortality in Ischemic Heart Failure With Reduced Ejection Fraction
Source: PubMed Central journal article supplement (PMC8249741; doi:10.3389/fmed.2021.672348), 2021-06-18
Supplement: Data_Sheet_1.pdf [file Data_Sheet_1.pdf]

**Supplemental table 1:** Reference ranges for blood chemistry

| <b>Laboratory parameters</b>     | <b>Reference range (unit)</b> |
|----------------------------------|-------------------------------|
| Creatinine, men                  | 0.7-1.2 (mg/dl)               |
| Creatinine, women                | 0.5-0.9 (mg/dl)               |
| NT-proBNP                        | 0-125 (pg/ml)                 |
| Serum phosphate                  | 0.8-1.45 (mmol/l)             |
| Total calcium, age 18 – 59 years | 2.15-2.50 (mmol/l)            |
| Total calcium, age 60 – 90 years | 2.20-2.55 (mmol/l)            |
| Total calcium, age > 90 years    | 2.05-2.40 (mmol/l)            |
| Albumin                          | 35-52 (g/l)                   |
| Magnesium                        | 0.66-1.07 (mmol/l)            |
| CRP                              | < 0.5 (mg/dl)                 |

*CRP: C-reactive protein; NT-proBNP: N-terminal pro B-type natriuretic peptide*

**Supplemental Table 2a:** Basic characteristics by T<sub>50</sub> tertiles in patients with ischemic HFrEF

Values are presented as median (interquartile range) or n (%). Reference ranges for blood chemistry parameters are shown in supplemental table 1.

|                                             | 1 <sup>st</sup> Tertile<br>n=41 | 2 <sup>nd</sup> Tertile<br>n=47 | 3 <sup>rd</sup> Tertile<br>n=51 | p Value        |
|---------------------------------------------|---------------------------------|---------------------------------|---------------------------------|----------------|
| T <sub>50</sub> (min)                       | 171 (142-228)                   | 291 (272-318)                   | 379 (353-407)                   |                |
| Age (years)                                 | 69 (61-73)                      | 65 (58-72)                      | 68 (61-77)                      | p=0.179        |
| Males                                       | 38 (92.7%)                      | 39 (83.0%)                      | 42 (92.4%)                      | p=0.306        |
| NYHA-class                                  |                                 |                                 |                                 |                |
| II                                          | 22 (53.7%)                      | 26 (55.3%)                      | 23 (45.1%)                      | p=0.611        |
| III                                         | 18 (43.9%)                      | 20 (42.6%)                      | 28 (54.9%)                      |                |
| IV                                          | 1 (2.4%)                        | 1 (2.1%)                        | 0 (0%)                          |                |
| LVEF                                        |                                 |                                 |                                 |                |
| Mild                                        | 12 (29.3%)                      | 14 (29.8%)                      | 13 (25.5%)                      | p=0.27         |
| Moderate                                    | 14 (34.1%)                      | 18 (38.3%)                      | 22 (43.1%)                      |                |
| Severe                                      | 15 (36.6%)                      | 15 (31.9%)                      | 16 (31.4%)                      |                |
| Comorbidities                               |                                 |                                 |                                 |                |
| Hypertension                                | 38 (92.7%)                      | 38 (80.9%)                      | 44 (86.3%)                      | p=0.273        |
| Atrial fibrillation/flutter                 | 18 (43.9%)                      | 14 (29.8%)                      | 24 (47.1%)                      | p=0.187        |
| Previous MCI                                | 32 (78.0%)                      | 43 (91.5%)                      | 46 (90.2%)                      | p=0.121        |
| PAD                                         | 13 (31.7%)                      | 10 (21.3%)                      | 16 (31.4%)                      | p=0.445        |
| Previous stroke or TIA                      | 4 (9.8%)                        | 7 (14.9%)                       | 2 (3.9%)                        | p=0.175        |
| Hyperlipidaemia                             | 38 (92.7%)                      | 44 (93.6%)                      | 43 (84.3%)                      | p=0.244        |
| Diabetes mellitus                           | 28 (68.3%)                      | 18 (38.3%)                      | 19 (37.3%)                      | <b>p=0.004</b> |
| Previous or active smoker                   | 30 (73.2%)                      | 36 (76.6%)                      | 38 (74.5%)                      | p=0.932        |
| Laboratory parameters                       |                                 |                                 |                                 |                |
| Creatinine (mg/dl)                          | 1.46 (1.06-1.89)                | 1.25 (0.99-1.46)                | 1.20 (1.06-1.50)                | <b>p=0.044</b> |
| eGFR, MDRD (ml/min/1.73 m <sup>2</sup> )    | 48.92 (37.96-68.38)             | 61.59 (46.80-79.86)             | 60.75 (46.86-70.30)             | p=0.065        |
| eGFR, CKD-EPI (ml/min/1.73 m <sup>2</sup> ) | 71.78 (63.56-80.10)             | 78.02 (69.38-89.10)             | 76.04 (67.10-83.21)             | p=0.070        |
| NT-proBNP (pg/ml)                           | 1544.00 (687.60-2927.00)        | 1313.00 (504.50-2073.00)        | 1323.00 (456.70-2596.00)        | p=0.687        |
| Phosphate (mmol/l)                          | 1.12 (1.00-1.39)                | 1.06 (0.97-1.16)                | 1.01 (0.86-1.09)                | <b>p=0.001</b> |
| Total calcium (mmol/l)                      | 2.42 (2.35-2.47)                | 2.43 (2.36-2.48)                | 2.45 (2.37-2.50)                | p=0.411        |
| Albumin (g/l)                               | 41.65 (39.05-44.25)             | 43.85 (41.00-45.75)             | 43.90 (41.43-45.68)             | <b>p=0.035</b> |
| iFGF-23 (pg/ml)                             | 70.50 (52.95-136.50)            | 63.80 (51.90-82.60)             | 62.00 (44.70-90.90)             | p=0.127        |
| cFGF-23 (RU/ml)                             | 57.20 (28.00-157.60)            | 30.10 (19.40-74.70)             | 35.40 (18.74-76.30)             | p=0.092        |
| Magnesium (mmol/l)                          | 0.81 (0.74-0.86)                | 0.83 (0.73-0.88)                | 0.84 (0.79-0.90)                | p=0.098        |
| CRP (mg/dl)                                 | 0.29 (0.17-0.57)                | 0.28 (0.10-0.52)                | 0.23 (0.15-0.55)                | p=0.726        |

*cFGF-23: C-terminal fibroblast growth factor 23; iFGF-23: intact fibroblast growth factor 23; HFrEF: heart failure with reduced ejection fraction; CRP: C-reactive protein; eGFR, CKD-EPI: estimated glomerular filtration rate using the Chronic Kidney Disease Epidemiology Collaboration-formula; eGFR, MDRD: estimated glomerular filtration rate using the Modification of Diet in Renal Disease-formula; MCI: myocardial infarction; NT-proBNP: N-terminal pro B-type natriuretic peptide; NYHA: New York Heart Association functional classification; LVEF: reduced left ventricular ejection fraction (mild:40-50% ejection fraction; moderate: 30-40% ejection fraction; severe: <30% ejection fraction); PAD: peripheral artery disease; T<sub>50</sub>: serum calcification propensity expressed by the half-maximum transition time from primary to secondary calciprotein particles as measured by nephelometry; TIA: transient ischemic attack*

**Supplemental Table 2b:** Basic characteristics by T<sub>50</sub> tertiles in patients with non-ischemic HFrEF

Values are presented as median (interquartile range) or n (%). Reference ranges for blood chemistry parameters are shown in supplemental table 1.

|                                             | 1 <sup>st</sup> Tertile<br>n=61 | 2 <sup>nd</sup> Tertile<br>n=55 | 3 <sup>rd</sup> Tertile<br>n=51 | p Value           |
|---------------------------------------------|---------------------------------|---------------------------------|---------------------------------|-------------------|
| T <sub>50</sub> (min)                       | 171 (120-215)                   | 289 (270-318)                   | 366 (357-405)                   |                   |
| Age (years)                                 | 60 (50-67)                      | 62 (53-68)                      | 63 (56-71)                      | p=0.275           |
| Males                                       | 52 (85.2%)                      | 40 (72.7%)                      | 38 (74.5%)                      | p=0.212           |
| NYHA-class                                  |                                 |                                 |                                 |                   |
| II                                          | 32 (52.5%)                      | 36 (65.5%)                      | 29 (56.9%)                      | p=0.687           |
| III                                         | 27 (44.3%)                      | 18 (32.7%)                      | 20 (39.2%)                      |                   |
| IV                                          | 2 (3.3%)                        | 1 (1.8%)                        | 2 (3.9%)                        |                   |
| LVEF                                        |                                 |                                 |                                 |                   |
| Mild                                        | 18 (29.5%)                      | 18 (32.7%)                      | 26 (51%)                        | p=0.091           |
| Moderate                                    | 19 (31.1%)                      | 21 (38.2%)                      | 11 (21.6%)                      |                   |
| Severe                                      | 24 (39.3%)                      | 16 (29.1%)                      | 14 (27.5%)                      |                   |
| Comorbidities                               |                                 |                                 |                                 |                   |
| Hypertension                                | 41 (67.2%)                      | 38 (69.1%)                      | 37 (72.5%)                      | p=0.828           |
| Atrial fibrillation/flutter                 | 26 (42.6%)                      | 28 (50.8%)                      | 21 (41.2%)                      | p=0.544           |
| Previous MCI                                | 3 (4.9%)                        | 3 (5.5%)                        | 0 (0%)                          | p=0.252           |
| PAD                                         | 3 (4.9%)                        | 5 (9.1%)                        | 4 (7.8%)                        | p=0.669           |
| Previous stroke or TIA                      | 4 (6.6%)                        | 5 (9.1%)                        | 5 (9.8%)                        | p=0.805           |
| Hyperlipidaemia                             | 26 (42.6%)                      | 25 (45.5%)                      | 27 (52.9%)                      | p=0.538           |
| Diabetes mellitus                           | 19 (31.1%)                      | 18 (32.7%)                      | 13 (25.5%)                      | p=0.695           |
| Previous or active smoker                   | 49 (80.3%)                      | 40 (72.7%)                      | 36 (70.6%)                      | p=0.450           |
| Laboratory parameters                       |                                 |                                 |                                 |                   |
| Creatinine (mg/dl)                          | 1.14 (0.94-1.58)                | 1.11 (0.94-1.38)                | 1.08 (0.91-1.35)                | p=0.489           |
| eGFR, MDRD (ml/min/1.73 m <sup>2</sup> )    | 66.52 (47.40-85.17)             | 63.77 (51.39-80.12)             | 70.66 (50.53-85.26)             | p=0.778           |
| eGFR, CKD-EPI (ml/min/1.73 m <sup>2</sup> ) | 83.02 (73.28-94.21)             | 83.08 (71.69-92.05)             | 84.07 (74.73-91.44)             | p=0.998           |
| NT-proBNP (pg/ml)                           | 1263.00 (473.45-3030.00)        | 1212.00 (403.30-2739.00)        | 723.30 (338.40-1331.00)         | p=0.058           |
| Phosphate (mmol/l)                          | 1.21 (1.11-1.34)                | 1.06 (0.91-1.19)                | 0.94 (0.81-1.10)                | <b>p&lt;0.001</b> |
| Total calcium (mmol/l)                      | 2.43 (2.34-2.55)                | 2.44 (2.37-2.49)                | 2.47 (2.39-2.52)                | p=0.478           |
| Albumin (g/l)                               | 43.65 (40.33-45.95)             | 43.90 (41.90-45.20)             | 44.60 (42.40-46.80)             | p=0.127           |
| iFGF-23 (pg/ml)                             | 68.20 (50.35-97.05)             | 62.30 (43.50-86.40)             | 63.60 (42.40-78.90)             | p=0.121           |
| cFGF-23 (RU/ml)                             | 51.00 (21.45-156.05)            | 40.50 (18.00-97.50)             | 31.90 (16.00-82.80)             | p=0.279           |
| Magnesium (mmol/l)                          | 0.83 (0.77-0.91)                | 0.83 (0.76-0.86)                | 0.84 (0.80-0.87)                | p=0.427           |
| CRP (mg/dl)                                 | 0.51 (0.22-0.98)                | 0.36 (0.15-0.72)                | 0.27 (0.11-0.67)                | p=0.106           |

*cFGF-23: C-terminal fibroblast growth factor 23; iFGF-23: intact fibroblast growth factor 23; HFrEF: heart failure with reduced ejection fraction; CRP: C-reactive protein; eGFR, CKD-EPI: estimated glomerular filtration rate using the Chronic Kidney Disease Epidemiology Collaboration-formula; eGFR, MDRD: estimated glomerular filtration rate using the Modification of Diet in Renal Disease-formula; MCI: myocardial infarction; NT-proBNP: N-terminal pro B-type natriuretic peptide; NYHA: New York Heart Association functional classification; LVEF: reduced left ventricular ejection fraction (mild:40-50% ejection fraction; moderate: 30-40% ejection fraction; severe: <30% ejection fraction); PAD: peripheral artery disease; T<sub>50</sub>: serum calcification propensity expressed by the half-maximum transition time from primary to secondary calciprotein particles as measured by nephelometry; TIA: transient ischemic attack*

**Supplemental Table 3:** Univariate and multivariate Cox regression analysis of phosphate, iFGF-23 and cFGF-23 for all-cause and cardiovascular mortality

|                           | All-Cause Mortality                  |                  |                                        |              | Cardiovascular Mortality             |                  |                                        |                  |
|---------------------------|--------------------------------------|------------------|----------------------------------------|--------------|--------------------------------------|------------------|----------------------------------------|------------------|
|                           | Univariate analysis<br>HR (95% CI) P |                  | Multivariate analysis<br>HR (95% CI) P |              | Univariate analysis<br>HR (95% CI) P |                  | Multivariate analysis<br>HR (95% CI) P |                  |
| <b>Overall Cohort</b>     |                                      |                  |                                        |              |                                      |                  |                                        |                  |
| Phosphate*                | 1.14 (0.90 – 1.46)                   | 0.277            |                                        |              | 1.15 (0.86 – 1.53)                   | 0.353            |                                        |                  |
| <i>Model 1</i>            |                                      |                  | 1.19 (0.94 – 1.52)                     | 0.157        |                                      |                  | 1.20 (0.90 – 1.60)                     | 0.224            |
| <i>Model 2</i>            |                                      |                  | 1.12 (0.86 – 1.45)                     | 0.398        |                                      |                  | 1.08 (0.79 – 1.47)                     | 0.647            |
| <i>Model 3</i>            |                                      |                  | 1.08 (0.82 – 1.43)                     | 0.581        |                                      |                  | 1.04 (0.74 – 1.45)                     | 0.822            |
| iFGF-23**                 | 1.57 (1.20 – 2.05)                   | <b>0.001</b>     |                                        |              | 1.61 (1.17 – 2.22)                   | <b>0.004</b>     |                                        |                  |
| <i>Model 1</i>            |                                      |                  | 1.45 (1.09 – 1.94)                     | <b>0.012</b> |                                      |                  | 1.49 (1.05 – 2.10)                     | <b>0.024</b>     |
| <i>Model 2</i>            |                                      |                  | 1.29 (0.93 – 1.77)                     | 0.122        |                                      |                  | 1.24 (0.84 – 1.83)                     | 0.27             |
| <i>Model 3</i>            |                                      |                  | 1.06 (0.68 – 1.64)                     | 0.792        |                                      |                  | 1.15 (0.67 – 1.95)                     | 0.615            |
| cFGF-23**                 | 1.25 (1.13 – 1.38)                   | <b>&lt;0.001</b> |                                        |              | 1.29 (1.15 – 1.45)                   | <b>&lt;0.001</b> |                                        |                  |
| <i>Model 1</i>            |                                      |                  | 1.20 (1.08 – 1.34)                     | <b>0.001</b> |                                      |                  | 1.24 (1.10 – 1.40)                     | <b>&lt;0.001</b> |
| <i>Model 2</i>            |                                      |                  | 1.13 (0.99 – 1.29)                     | 0.063        |                                      |                  | 1.15 (0.99 – 1.34)                     | 0.074            |
| <i>Model 3</i>            |                                      |                  | 0.97 (0.81 – 1.16)                     | 0.735        |                                      |                  | 1.03 (0.84 – 1.26)                     | 0.794            |
| <b>Ischemic HFREF</b>     |                                      |                  |                                        |              |                                      |                  |                                        |                  |
| Phosphate*                | 1.19 (0.85 – 1.66)                   | 0.321            |                                        |              | 1.23 (0.83 – 1.81)                   | 0.299            |                                        |                  |
| <i>Model 1</i>            |                                      |                  | 1.24 (0.89 – 1.72)                     | 0.202        |                                      |                  | 1.28 (0.88 – 1.87)                     | 0.193            |
| <i>Model 2</i>            |                                      |                  | 1.27 (0.88 – 1.83)                     | 0.197        |                                      |                  | 1.30 (0.87 – 1.96)                     | 0.204            |
| <i>Model 3</i>            |                                      |                  | 1.41 (0.95 – 2.11)                     | 0.09         |                                      |                  | 1.37 (0.88 – 2.15)                     | 0.163            |
| iFGF-23**                 | 1.55 (1.05 – 2.29)                   | <b>0.027</b>     |                                        |              | 1.68 (1.08 – 2.62)                   | <b>0.020</b>     |                                        |                  |
| <i>Model 1</i>            |                                      |                  | 1.50 (1.00 – 2.26)                     | 0.052        |                                      |                  | 1.64 (1.03 – 2.61)                     | <b>0.036</b>     |
| <i>Model 2</i>            |                                      |                  | 1.48 (0.93 – 2.35)                     | 0.097        |                                      |                  | 1.61 (0.96 – 2.72)                     | 0.072            |
| <i>Model 3</i>            |                                      |                  | 1.42 (0.72 – 2.80)                     | 0.315        |                                      |                  | 1.56 (0.73 – 3.33)                     | 0.253            |
| cFGF-23**                 | 1.19 (1.03 – 1.37)                   | <b>0.018</b>     |                                        |              | 1.24 (1.07 – 1.44)                   | <b>0.005</b>     |                                        |                  |
| <i>Model 1</i>            |                                      |                  | 1.15 (0.99 – 1.34)                     | 0.075        |                                      |                  | 1.20 (1.03 – 1.41)                     | <b>0.021</b>     |
| <i>Model 2</i>            |                                      |                  | 1.08 (0.91 – 1.29)                     | 0.363        |                                      |                  | 1.18 (0.97 – 1.42)                     | 0.095            |
| <i>Model 3</i>            |                                      |                  | 0.85 (0.66 – 1.09)                     | 0.207        |                                      |                  | 1.04 (0.79 – 1.38)                     | 0.772            |
| <b>Non-ischemic HFREF</b> |                                      |                  |                                        |              |                                      |                  |                                        |                  |
| Phosphate*                | 1.11 (0.78 – 1.57)                   | 0.563            |                                        |              | 1.07 (0.69 – 1.65)                   | 0.766            |                                        |                  |
| <i>Model 1</i>            |                                      |                  | 1.16 (0.81 – 1.65)                     | 0.421        |                                      |                  | 1.11 (0.72 – 1.73)                     | 0.634            |
| <i>Model 2</i>            |                                      |                  | 0.99 (0.69 – 1.44)                     | 0.972        |                                      |                  | 0.84 (0.52 – 1.34)                     | 0.466            |
| <i>Model 3</i>            |                                      |                  | 0.94 (0.62 – 1.42)                     | 0.769        |                                      |                  | 0.78 (0.45 – 1.34)                     | 0.364            |
| iFGF-23**                 | 1.57 (1.08 – 2.30)                   | <b>0.019</b>     |                                        |              | 1.52 (0.94 – 2.45)                   | 0.087            |                                        |                  |
| <i>Model 1</i>            |                                      |                  | 1.48 (0.97 – 2.26)                     | 0.07         |                                      |                  | 1.43 (0.84 – 2.43)                     | 0.19             |
| <i>Model 2</i>            |                                      |                  | 1.16 (0.72 – 1.87)                     | 0.546        |                                      |                  | 0.90 (0.49 – 1.65)                     | 0.738            |
| <i>Model 3</i>            |                                      |                  | 0.83 (0.43 – 1.59)                     | 0.573        |                                      |                  | 0.76 (0.33 – 1.73)                     | 0.509            |
| cFGF-23**                 | 1.34 (1.13 – 1.57)                   | <b>0.001</b>     |                                        |              | 1.37 (1.12 – 1.67)                   | <b>0.002</b>     |                                        |                  |
| <i>Model 1</i>            |                                      |                  | 1.31 (1.10 – 1.56)                     | <b>0.002</b> |                                      |                  | 1.35 (1.09 – 1.68)                     | <b>0.006</b>     |
| <i>Model 2</i>            |                                      |                  | 1.21 (0.97 – 1.51)                     | 0.096        |                                      |                  | 1.09 (0.84 – 1.43)                     | 0.513            |
| <i>Model 3</i>            |                                      |                  | 1.00 (0.76 – 1.32)                     | 1            |                                      |                  | 0.91 (0.66 – 1.25)                     | 0.572            |

*The multivariate model was adjusted for the following covariates:*

*Model 1: age and sex;*

*Model 2: age, sex, smoking, systolic blood pressure, diabetes, total cholesterol, low density lipoprotein, body mass index and history of cardiovascular events;*

*Model 3: age, sex, race, smoking, systolic blood pressure, diabetes, total cholesterol, low density lipoprotein, body mass index, history of cardiovascular events, high sensitivity C-reactive protein, NT-proBNP, NYHA classification and eGFR (CKD-EPI)*

*\* Hazard ratios reflect the impact of a one standard deviation increase in serum phosphate.*

*\*\* Hazard ratios reflect the impact of doubling of FGF-23 on the original variable's scale.*

*cFGF-23: C-terminal fibroblast growth factor 23; iFGF-23: intact fibroblast growth factor 23; NT-proBNP: N-terminal pro B-type natriuretic peptide; NYHA: New York Heart Association functional classification; eGFR (CKD-EPI): estimated glomerular filtration rate using the Chronic Kidney Disease Epidemiology Collaboration-formula; HFrEF: heart failure with reduced ejection fraction; HR: hazard ratio*

**Supplemental Figure 1:** Kaplan-Meier estimates for overall survival according to iFGF-23 tertiles for the whole cohort (A,  $p=0.001$ ), patients with ischemic heart failure with reduced ejection fraction (HFrEF; B,  $p=0.148$ ) and patients with non-ischemic HFrEF (C,  $p=0.005$ )

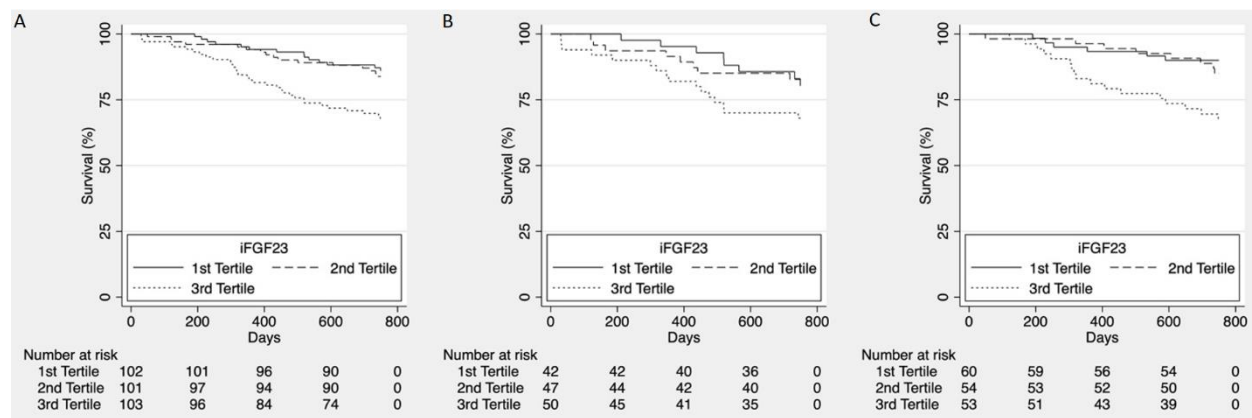

*iFGF-23: intact fibroblast growth factor 23*

**Supplemental Figure 2:** Kaplan-Meier estimates for overall survival according to cFGF-23 tertiles for the whole cohort (A,  $p\leq 0.001$ ), patients with ischemic heart failure with reduced ejection fraction (HFrEF; B,  $p=0.037$ ) and patients with non-ischemic HFrEF (C,  $p=0.001$ )

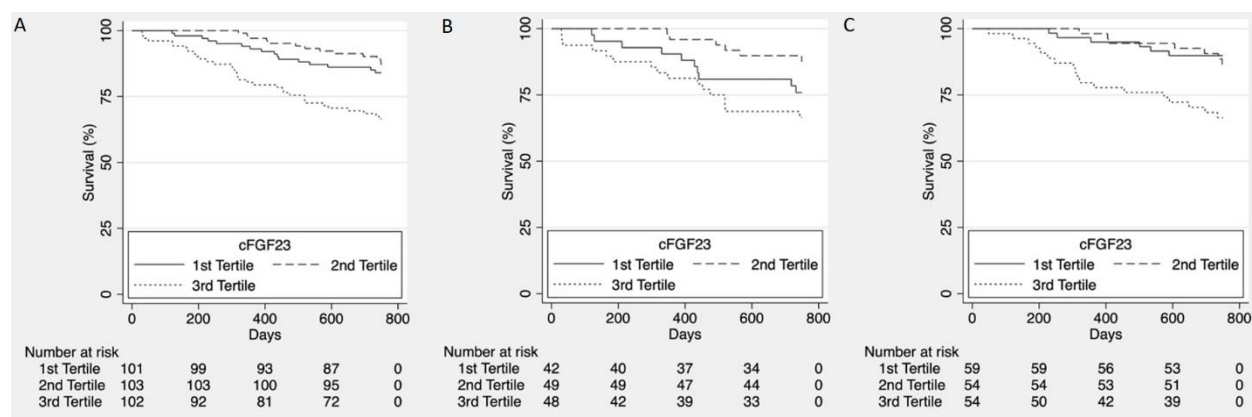

*cFGF-23: C-terminal fibroblast growth factor 23*

**Supplemental Figure 3:** Kaplan-Meier estimates for cardiovascular survival according to iFGF-23 tertiles for the whole cohort (A,  $p=0.005$ ), patients with ischemic heart failure with reduced ejection fraction (HFrEF; B,  $p=0.107$ ) and patients with non-ischemic HFrEF (C,  $p=0.040$ )

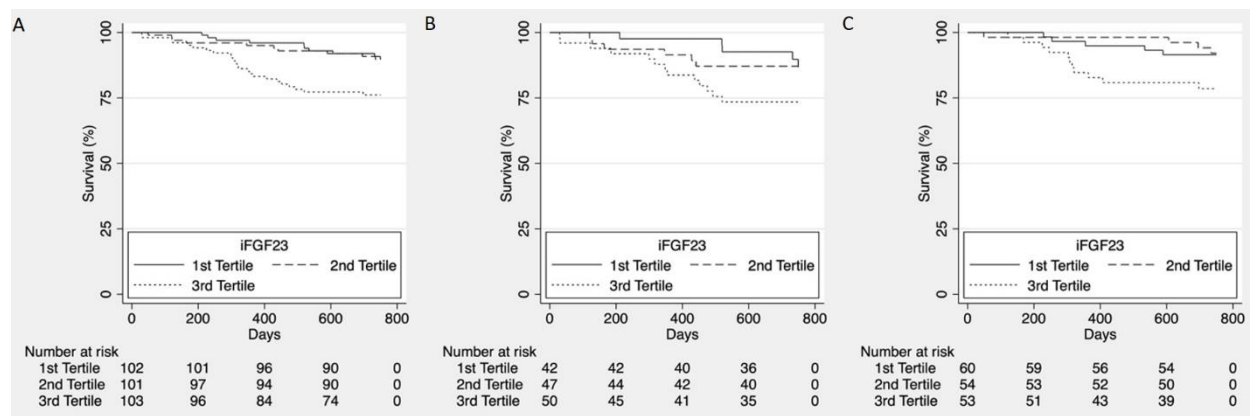

*iFGF-23: intact fibroblast growth factor 23*

**Supplemental Figure 4:** Kaplan-Meier estimates for cardiovascular survival according to cFGF-23 tertiles for the whole cohort (A,  $p\leq 0.001$ ), patients with ischemic heart failure with reduced ejection fraction (HFrEF; B,  $p=0.054$ ) and patients with non-ischemic HFrEF (C,  $p=0.009$ )

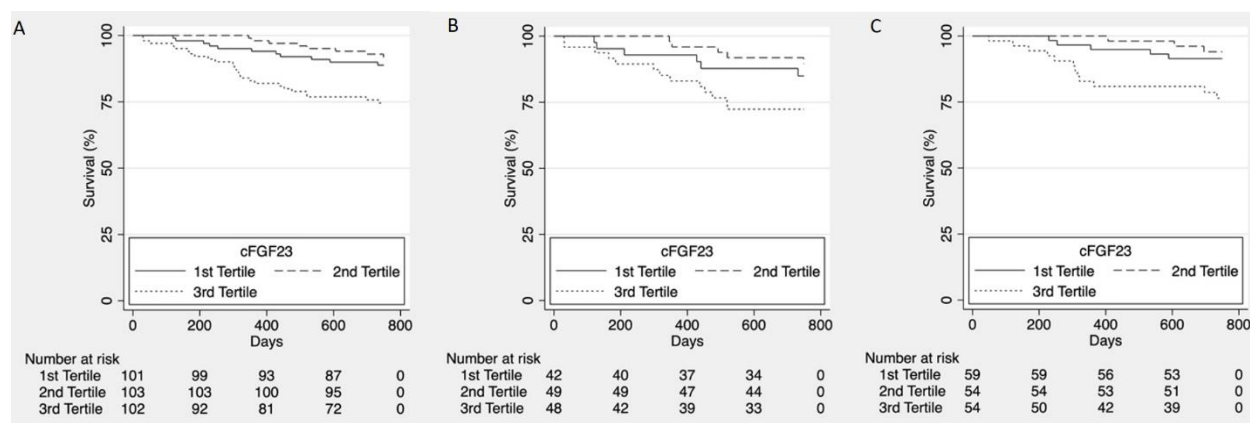

*cFGF-23: C-terminal fibroblast growth factor 23*
